# Supplementary material
Source: ML conference proceedings conference paper supplement (https://proceedings.neurips.cc/paper_files/paper/2013/hash/3a835d3215755c435ef4fe9965a3f2a0-Abstract.html)
Supplement: Supplementary file [file 3a835d3215755c435ef4fe9965a3f2a0-Supplemental.zip]

---

# Supplementary Material for “Manifold-based Similarity Adaptation for Label Propagation”

---

Masayuki Karasuyama and Hiroshi Mamitsuka  
Bioinformatics Center, Institute for Chemical Research  
Kyoto University  
Gokasyo, Uji, Kyoto, Japan  
{karasuyama, mami}@kuicr.kyoto-u.ac.jp

## 1 Proof of Theorem 1

**Theorem 1.** Suppose  $\mathbf{x}_i$  can be approximated by its neighbors as follows

$$\mathbf{x}_i = \frac{1}{D_{ii}} \sum_{j \sim i} W_{ij} \mathbf{x}_j + \mathbf{e}_i, \quad (1)$$

where  $\mathbf{e}_i \in \mathbb{R}^p$  represents an approximation error. Then, the same adjacency matrix reconstructs the output  $y_i \in \mathbb{R}$  with the following error:

$$y_i - \frac{1}{D_{ii}} \sum_{j \sim i} W_{ij} y_j = \mathbf{J} \mathbf{e}_i + O(\|\delta \boldsymbol{\tau}_i\|_2^2) + O(\varepsilon_x + \varepsilon_y), \quad (2)$$

where  $\mathbf{J} = \frac{\partial h(\boldsymbol{\tau}_i)}{\partial \boldsymbol{\tau}^\top} \left( \frac{\partial g(\boldsymbol{\tau}_i)}{\partial \boldsymbol{\tau}^\top} \right)^+$  with superscript  $+$  indicates pseudoinverse, and  $\delta \boldsymbol{\tau}_i = \max_j (\|\boldsymbol{\tau}_i - \boldsymbol{\tau}_j\|_2^2)$ .

*Proof.* Let  $\beta_j = W_{ij}/D_{ii}$  (Note that then  $\sum_{j \sim i} \beta_j = 1$ ). Assuming that  $g$  is smooth enough, we obtain the following first-order Taylor expansion at  $\boldsymbol{\tau}_i$  for the right hand side of (1).

$$\begin{aligned} \mathbf{x}_i &= \sum_{j \sim i} \beta_j \left( g(\boldsymbol{\tau}_i) + \frac{\partial g(\boldsymbol{\tau}_i)}{\partial \boldsymbol{\tau}^\top} (\boldsymbol{\tau}_j - \boldsymbol{\tau}_i) + O(\|\boldsymbol{\tau}_j - \boldsymbol{\tau}_i\|_2^2) \right) \\ &\quad + \mathbf{e}_i + O(\varepsilon_x), \end{aligned}$$

Arranging this equation, we obtain

$$\frac{\partial g(\boldsymbol{\tau}_i)}{\partial \boldsymbol{\tau}^\top} \sum_{j \sim i} \beta_j (\boldsymbol{\tau}_j - \boldsymbol{\tau}_i) = -\mathbf{e}_i + O(\|\delta \boldsymbol{\tau}_i\|_2^2) + O(\varepsilon_x).$$

If the Jacobian matrix  $\frac{\partial g(\boldsymbol{\tau}_i)}{\partial \boldsymbol{\tau}^\top}$  has full column rank, we obtain

$$\begin{aligned} \sum_{j \sim i} \beta_j (\boldsymbol{\tau}_j - \boldsymbol{\tau}_i) &= - \left( \frac{\partial g(\boldsymbol{\tau}_i)}{\partial \boldsymbol{\tau}^\top} \right)^+ \mathbf{e}_i + O(\|\delta \boldsymbol{\tau}_i\|_2^2) \\ &\quad + O(\varepsilon_x). \end{aligned} \quad (3)$$

On the other hand, we can see

$$\begin{aligned}
\sum_{j \sim i} \beta_j y_j &= \sum_{j \sim i} \beta_j \left( h(\boldsymbol{\tau}_i) + \frac{\partial h(\boldsymbol{\tau}_i)}{\partial \boldsymbol{\tau}^\top} (\boldsymbol{\tau}_j - \boldsymbol{\tau}_i) \right. \\
&\quad \left. + O(\|\boldsymbol{\tau}_j - \boldsymbol{\tau}_i\|_2^2) \right) + O(\varepsilon_y) \\
&= y_i + \frac{\partial h(\boldsymbol{\tau}_i)}{\partial \boldsymbol{\tau}^\top} \sum_{j \sim i} \beta_j (\boldsymbol{\tau}_j - \boldsymbol{\tau}_i) \\
&\quad + O(\|\delta \boldsymbol{\tau}_i\|_2^2) + O(\varepsilon_y)
\end{aligned} \tag{4}$$

Substituting (3) into (4), we obtain

$$\begin{aligned}
y_i - \sum_{j \sim i} \beta_j y_j &= \frac{\partial h(\boldsymbol{\tau}_i)}{\partial \boldsymbol{\tau}^\top} \left( \frac{\partial g(\boldsymbol{\tau}_i)}{\partial \boldsymbol{\tau}^\top} \right)^\top \mathbf{e}_i \\
&\quad + O(\|\delta \boldsymbol{\tau}_i\|_2^2) + O(\varepsilon_x + \varepsilon_y).
\end{aligned}$$

□

## 2 Theorem 1 for Normalized Laplacian

**Theorem 2.** Suppose that  $\mathbf{x}_i$  can be approximated by its neighbors as follows

$$\mathbf{x}_i = \sum_{j \sim i} \frac{W_{ij}}{\sqrt{D_{ii} D_{jj}}} \mathbf{x}_j + \mathbf{e}_i, \tag{5}$$

where  $\mathbf{e}_i \in \mathbb{R}^p$  represents an approximation error. Then, the same adjacency matrix reconstructs the output  $y_i \in \mathbb{R}$  with the following error:

$$\begin{aligned}
y_i - \sum_{j \sim i} \frac{W_{ij}}{\sqrt{D_{ii} D_{jj}}} y_j &= (1 - \sum_{j \sim i} \gamma_j) (h(\boldsymbol{\tau}_i) + \mathbf{J} g(\boldsymbol{\tau}_i)) \\
&\quad + \mathbf{J} \mathbf{e}_i + O(\|\delta \boldsymbol{\tau}_i\|_2^2) + O(\varepsilon_x + \varepsilon_y),
\end{aligned} \tag{6}$$

where

$$\gamma_j = \frac{W_{ij}}{\sqrt{D_{ii} D_{jj}}}.$$

*Proof.* The proof is almost the same as Theorem 1. However, the sum of the coefficients  $\gamma_j$  (corresponding to  $\beta_j$  in Theorem 1) cannot be 1. Applying the same Taylor expansion to the right hand side of (5), we obtain

$$\begin{aligned}
\frac{\partial g(\boldsymbol{\tau}_i)}{\partial \boldsymbol{\tau}^\top} \sum_{j \sim i} \gamma_j (\boldsymbol{\tau}_j - \boldsymbol{\tau}_i) &= -\mathbf{e}_i + (1 - \sum_{j \sim i} \gamma_j) g(\boldsymbol{\tau}_i) \\
&\quad + O(\|\delta \boldsymbol{\tau}_i\|_2^2) + O(\varepsilon_x).
\end{aligned}$$

On the other hand, applying Taylor expansion to  $y_i - \sum_{j \sim i} \gamma_j y_j$ , we obtain

$$\begin{aligned}
y_i - \sum_{j \sim i} \gamma_j y_j &= (1 - \sum_{j \sim i} \gamma_j) h(\boldsymbol{\tau}_i) - \frac{\partial h(\boldsymbol{\tau}_i)}{\partial \boldsymbol{\tau}^\top} \sum_{j \sim i} \gamma_j (\boldsymbol{\tau}_j - \boldsymbol{\tau}_i) \\
&\quad + O(\|\delta \boldsymbol{\tau}_i\|_2^2) + O(\varepsilon_y)
\end{aligned}$$

Using the above two equations, we obtain (6). □
